# Supplementary material
Source: PubMed Central journal article supplement (PMC2077310)
Supplement: blood_blood-2007-04-086827_1.pdf [file blood_blood-2007-04-086827_1.pdf]

| Gene Name      | Sense Primer            | Anti-sense Primer      | Product Length |
|----------------|-------------------------|------------------------|----------------|
| $\beta$ -actin | GGTGGGAATGGGTGAGAA<br>G | AGGAAGAGGATGCGGCAGTG   | 578bp          |
| Lycat          | TGGATTAGCAGCCGTCTTG     | GCAAATCTTCTCCACCCTGA   | 210bp          |
| Flk1           | CACCTGGCACTCTCCACCTTC   | GATTCATCCACTACCGAAAG   | 250bp          |
| Gata1          | GGGAAGAGCAACAACACGTTT   | GTTTGTGACAATCATTGCGT   | 380bp          |
| Gata2          | CCGACGAGGTGGATGTCTTC    | TTGGAGAACGGGCTGACG     | 243bp          |
| Runx1          | GACTCTCAACGGCTCCGGAC    | GCATTCACAGTTTCCCTCCG   | 584bp          |
| Scl            | TAGGCAGTGGGTTCTTTGGG    | GAAGGTCTTCAGGGGGGATG   | 396bp          |
| CD41           | GGATACCCAGACCTGATTG     | CACGTTGAGGCTTAGCAC     | 423bp          |
| Tie2           | CCACTACACCTTCTTTACA     | CATCCTTCCACTGCTAC      | 425bp          |
| GAPDH          | GTTGTCTCTCGGACTTCA      | TGGTCCAGGGTTTCTTACTC   | 182bp          |
| Lycat          | AGAGGCTGGGTGATGAGTTC    | GAGGCAGGATTTAGGGAGA    | 163bp          |
| HNF3 $\beta$   | AACTCCATCCGCCACTCT      | AGGTAGCAGCCGTTCTCG     | 134bp          |
| Flk1           | GAAATTGAGCTATCTGCCGGA   | TTGAAGGTGGAGAGTGCCAG   | 101bp          |
| Scl            | GGAGCCAACACCCAAGCA      | CCTGAAGCCCAGCAACCC     | 146bp          |
| Gata1          | AGGCACCCAATGCACTAAGT    | AGCTTGAAATAGAGGCCGAG   | 102bp          |
| Gata2          | CAGTCATGACTATGGCAGCA    | TGGCACCACAGTTGACACACT  | 135bp          |
| CD31           | CTCCAACGAGAATTTGTGC     | TGCAATTTGAATCCGGACAG   | 103bp          |
| Runx1          | CCATGAAGAACCAGGTAGCGA   | GCGGATTTGTAAGACGGTGA   | 102bp          |
| $\beta$ -H1    | CATGGCAAGAAAGTGCTGACAT  | AGCTTGTCACAGTGCAGCTCAC | 101bp          |
| Ve-Cadherin    | AGGCAAAAACAAAGCCATGG    | TCTGGTTTTCTGGCAGCTTGA  | 101bp          |
| Major-H1       | AGGCCCATGGCAAGAAAGT     | CATGCAGCTTGTCACAGTGGA  | 111bp          |
| Tie2           | CAGGCTGATTGTTCCGGAGATG  | TGCATTCCCCGGTATCTTCA   | 110bp          |
| CD41           | TCCAAGCCCCAAAACCCCT     | CACCGAGTGCCCGAAATA     | 145bp          |
| Etsrp71        | CTGGGACTGTTCTGTGGGC     | AGGGCGTGGTGAATGCTG     | 190bp          |
| BMP4           | CCCTCCTGGTCACTTTTG      | GGCGACGGCAGTCTTAT      | 120bp          |
| BMP7           | TTGGCTGGCAGGACTGGA      | CTGGACGATGGCGTGGTT     | 116bp          |
| Lmo2           | CGGAAATTGTGCAGGAGAGAC   | ACCGCATCGTCATCTCATAG   | 101bp          |
| Gata3          | CCTTATCAAGCCCAAGCGAAG   | CATTAGCGTTCCTCCTCCAGAG | 104bp          |
| Bmper          | GCTCGCTGGGATTACCT       | CCCCTTCATTTTACATTTTGC  | 120bp          |
| Gab1           | CGTCTCTGGGCTGCGTTTG     | ACTTCGCCGCCGCTCATG     | 123bp          |
| VEGF-C         | GGGAGGAAACCACGGGACA     | CGGCGAGCAGGAACAG       | 145bp          |
| Edg1           | TTGCCATCGCCATTGAGC      | TTGTGGTAGAGCGGGAGC     | 193bp          |
| Id3            | GCCTCTTAGCCTCTTGAGC     | GGATCGGGAGATGCGGAC     | 168bp          |
| Sema3a         | GGACGGGACTTCGCTATCT     | GTATCTTCAGGGTTGTCACTC  | 138bp          |
| Lsp1           | CTCCAGCCCTGACCAAG       | GGAGGGTCCAGGAGCAA      | 105bp          |
| Pdgf $\alpha$  | TCCGCTAACTTCTAATCTG     | AACTTCGCCTTCTTCTG      | 152bp          |
| Neuropilin     | AGGGAACAAGGGAGGAGC      | CAGTGAAAGCGGAGTAACAGAG | 112bp          |
| EpoR           | GGGGACCCAGGGCAGAT       | CGGGGCAGCAACCACTTA     | 100bp          |
| Ets2           | TGTTTGCTGTGCTCCCTTCT    | CGTCGTGCTCCTTTTGG      | 181bp          |
| Smad7          | CCCCATCTTCATCAAGTCCG    | GCCCCAGCCCTTCACAAA     | 108bp          |
| Fzd4           | CCCCAGAACGACCACAAC      | TCAGGCTCCTCTTACCC      | 147bp          |
| Hlx            | GAGGGTGAACGGGAGGAG      | TGCTGGCAGTGATGAGGG     | 183bp          |
| IGF2           | CATCGTGGAAGAGTGCTGC     | CGGGGTATCTGGGGAAAGT    | 123bp          |
| Mef2b          | TCCAGCCTCCACAGAGTTCC    | GTGCCCTCCGAGTCTT       | 142bp          |
| Fkbp6          | CCTGTTCAAGCCAGCCTAT     | CAGTTGCTGCTACTTTGAGGAC | 189bp          |
| Smardc3        | TGGAGCAGTGCCTGGTCGTG    | CCAGCCCTCCCCACCTTCCG   | 143bp          |
| Hoxb7          | CGTCCCCGACTACAAATCA     | GCACCGAGGCGGAGAAAG     | 197bp          |
| Hoxb6          | AACTCCACCTTCCCGTCA      | CGCAAAGCCCTTGTCCTG     | 199bp          |
| Hoxb5          | AGTTGAGGTTGGGTAGTGCTG   | CTGGGTGGGGCTGAAGAA     | 103bp          |
| Hoxb1          | GGTCAGTCGGAAGGAGATGG    | GGGCTGCGGCGGAGGATA     | 122bp          |
| Cdx1           | ACGCCTAGAGCTGGAAGGGA    | TCTTACCTGCCGCTCTGTGA   | 104bp          |
| Dppa5          | TTCCGGGCTAAATGGATGC     | CCGCCAGAACCAAACT       | 174bp          |
| Dppa4          | GAGGAAGTCAGCACCAACCG    | GCAGCCGAACCAACAC       | 199p           |
| Sall4          | TTCTCCGCTGTGACGCTC      | GCTATCTGTCCCGAAAACCT   | 155bp          |
