# Supplementary material
Source: PubMed Central journal article supplement (PMC2077310)
Supplement: blood_blood-2007-04-086827_2.pdf [file blood_blood-2007-04-086827_2.pdf]

| Gene Name                    | GeneBank Accession Number | Array Fold changes | Q-PCR Fold Changes |
|------------------------------|---------------------------|--------------------|--------------------|
| Etsrp71                      | NM_007959                 | 3.5                | 9.2                |
| Flk1                         | NM_010612                 | 8.0                | 7.75               |
| Bmp4                         | NM_007554                 | 5.0                | 7.0                |
| Bmp7                         | NM_007557                 | 3.5                | 1.4                |
| Bmper                        | NM_028472                 | 2.0                | 2.8                |
| Gab1                         | NM_021356                 | 2.4                | 2.42               |
| Gata2                        | NM_008090                 | 3.2                | 2.1                |
| Gata3                        | NM_008091                 | 2.2                | 3.7                |
| Tal1/Scf                     | NM_011527                 | 3.0                | 3.0                |
| Lmo2                         | NM_008505                 | 3.0                | 3.8                |
| EpoR                         | NM_010149                 | 2.7                | 3.2                |
| Hemoglobin $\beta$ -H1 chain | NM_008219                 | 7.75               | 6.45               |
| Ets2                         | NM_011809                 | 2.6                | 3.5                |
| Smad7                        | NM_008543                 | 2.98               | 3.4                |
| Gadd45g                      | NM_011817                 | 8                  | 7.3                |
| Fzd4                         | NM_008055                 | 5.48               | 3                  |
| Hlx                          | NM_008250                 | 3.7                | 3.5                |
| Igf2                         | BF782982                  | 2.2                | 9.9                |
| Vegf-C                       | NM_009506                 | 3.13               | 17.1               |
| Edg1                         | NM_007901                 | 4.1                | 4.6                |
| Id-3                         | NM_008321                 | 2.98               | 2.5                |
| Sema3a                       | NM_009152                 | 3                  | 2.1                |
| Lsp1                         | NM_019391                 | 3                  | 3.6                |
| PDGF $\alpha$                | AK017169                  | 2.29               | 1.1                |
| Nrp1                         | NM_008737                 | 2.2                | 2.12               |
| Mef2b                        | NM_008578                 | 0.4                | 0.97               |
| Smardc3                      | NM_025891                 | 3.0                | 0.6                |
| FKBP6                        | NM_033571                 | 3.2                | 0.26               |
| HoxB7                        | NM_010460                 | 2.75               | 3.0                |
| HoxB6                        | NM_008269                 | 3.67               | 4.0                |
| HoxB5                        | NM_008268                 | 4.4                | 2.0                |
| HoxB1                        | NM_008266                 | 0.65               | 0.3                |
| Cdx1                         | NM_009880                 | 2.3                | 0.5                |
| Dppa4                        | NM_028610                 | 0.38               | 0.14               |
| Dppa5                        | XM_001005562              | 0.39               | 0.29               |
| Sall4                        | NM_175303                 | 0.5                | 0.33               |
