# Supplementary material
Source: PubMed Central journal article supplement (PMC2077310)
Supplement: blood_blood-2007-04-086827_3.pdf [file blood_blood-2007-04-086827_3.pdf]

```

1      10      20      30      40      50      60      70      80
|-----|-----|-----|-----|-----|-----|-----|-----|
DRLycat      MYSRPGVCFLLFLLLSVFGSVFMLGPLLPLMLLSPSRYRRT
TNLYcat      MAVSARGLYFVYTLFLGSFFGSIFMLGPVLPMLFLSPAMYRMI
HSLycat      MHSRGREIVVLLNPHMSINEAVSSYCTYFIKQDSKSFGLMYSWKGIYFILTLFNGSFFGSIFMLSPFLPLMFVNPMSHYRMI
MMLycat
Consensus      .....nvs..g.yf.ltlf.gsffgsifnl.p.lplnf..pswyrwi

81     90     100    110    120    130    140    150    160
|-----|-----|-----|-----|-----|-----|-----|-----|
DRLycat      TDRIVATNLTLPVALLELVLVGKVVYVTDGDFIPGERSVIIMNHRTRLDWMFLWCCLLRYSYLRQEKICLKAALKSVPGFG
TNLYcat      TDRIVATNLTLPVSLLELVFVGVYVITGDGFVPGERSVIIMNHRTRLDWMFLWCCLLRYSYLRLEKICLKAALKSVPGFG
HSLycat      NNRLVATNLTLPVALLETFVGVYVITGDGFVPGERSVIIMNHRTRLDWMFLWNCMLRYSYLRLEKICLKAALKSVPGFG
MMLycat      MFVGRVYVITGDGFVPGERSVIIMNHRTRVDMFLWNCMLRYSYLRLEKICLKAALKSVPGFG
Consensus      ..r.vatvltlpvalle.nfGVkV!!TGDaF!PGRSVIIMNHRTR.DWMFLWnCL$RYSYLRLEKICLkaLkSVPGFG

161    170    180    190    200    210    220    230    240
|-----|-----|-----|-----|-----|-----|-----|-----|
DRLycat      WAMQVASFIFIQRRWEDDRTMNSMLQYFCRIRPEVQQLLFPEGTDLTENTRARSDEFAEKNGLQKYEYVLPRTTGFTF
TNLYcat      WAMQVACFYFIQRRWTEOKKHMENMLDYFCDIRPELQQLLFPEGTDLTENTRQKSDAFAQNNLPKFYYVLPRTTGFTF
HSLycat      WAMQAAAYIFIHRKWKDDKSHFEDMIDYFCDIHEPLQQLIFPEGTDLTENSRSNAFAEKNGLQKYEYVLPRTTGFTF
MMLycat      WAMQVAAFIFIHRKWKDDKSHFEDMIDYFCDIHEPLQQLIFPEGTDLTENNKARSNDFAEKNGLQKYEYVLPRTTGFTF
Consensus      WAMQvAa%!FIhRkKk#DksHfe#Mi#YFcdIhEPLQQLIFPEGTDLTEN.karS#aFAekNgLqK%EYVLPRTTGFTF

241    250    260    270    280    290    300    310    320
|-----|-----|-----|-----|-----|-----|-----|-----|
DRLycat      IVDTLRGGDNLDAVHDIAYVYPQNIPTERHLLAGVFPREIHFHVQRFTVASVPAGAAGLQAMCQERWREKERRLQRFYE
TNLYcat      IVDRLRKGDNLDAVHDIIVAYPKNIPQTERHLLGLFPREIHFHVRRYPVTHLPSSSSDLESACRDRWAEKEARLHDFYS
HSLycat      VVDRLREGKNLDAVHDIIVAYPHNIPQSEKHLLQGFPRREIHFHVHRYPIDLPTSKEDLQLWCHKRWEEKEERLRSFYQ
MMLycat      VVDRLREGKNLDAVHDIIVAYPNIPQTEKHLLLGDFPKEIHFHVQRYPADSLPTSKEDLQLWCHKRWEEKEERLRSFYQ
Consensus      !VDrLReGkNLDAVHDIvAYP.NIPQtEKHLlIGDFPREIHFHVqR%p.ds!Pt.skedL#lWCh.RWaeKEeRLrsFYq

321    330    340    350    360    370    380    390    400
|-----|-----|-----|-----|-----|-----|-----|-----|
DRLycat      TVPRRFDAPAVGVCVREPCQSGQCVCVPRCKSEGRVRIILVASLLYASVFIITACASLCLCPPAQFYFLFMVVFVFLCQQ
TNLYcat      AQRGFDRODGIAR-----VPPCKTELRLVALIKASLLYSSFIALCLTGLWLMPPFRLYFLVMVGVVYVAAQQ
HSLycat      GE-KNFYFTGQSV-----IPPCKSELRLVYKLLSILYATLFSAMCLLIYLSLVKHYFIITIVIFVLQE
MMLycat      GE-KNFHFTGQST-----VPPCKSELRLVYKLLSIVYHALFCSAMCLLIYLYSPVRMYFIISIVFFVLQE
Consensus      ge.knF.ftgqsv.....!PpCKsEIRVlv!klISiIYW.lF..anclliyLyspvruYFii.!vf%vIQ#

401    410    420    431
|-----|-----|-----|-----|
DRLycat      RFTGGLELMEIACHRYNSRRSADKQE
TNLYcat      KLIGGLELLELSCHRYNKSMAAGVGEKEKMK
HSLycat      RIFGGLEIIEIACYRLLHKQPHLNSKKNE
MMLycat      RIFGGLEIIEIACYRFLHKHPHLNSKKNE
Consensus      rifGGLEiiELaCyR.lhk.phlnskkne..

```
