# Supplementary material
Source: PubMed Central journal article supplement (PMC2077310)

**A**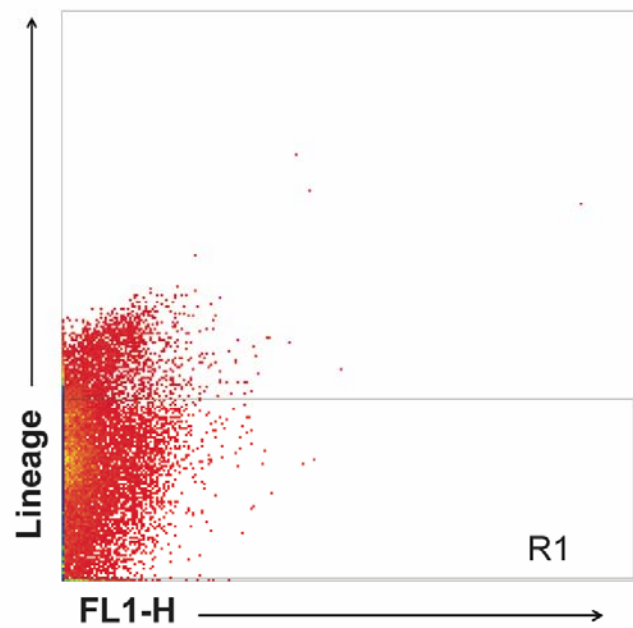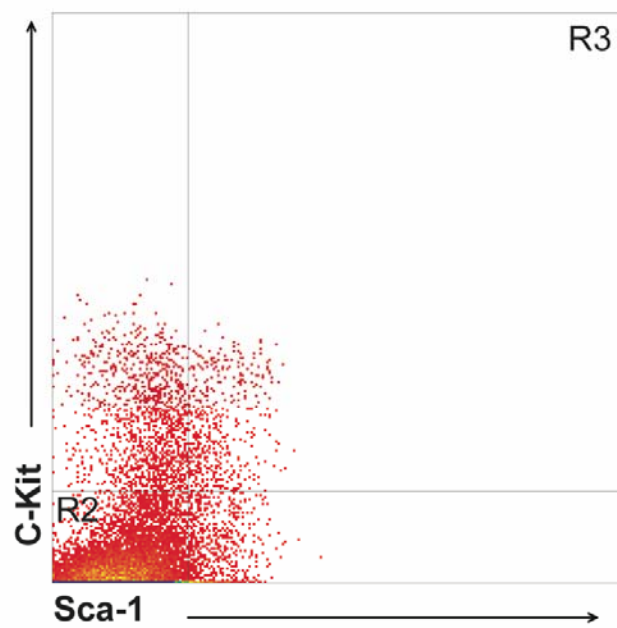**B**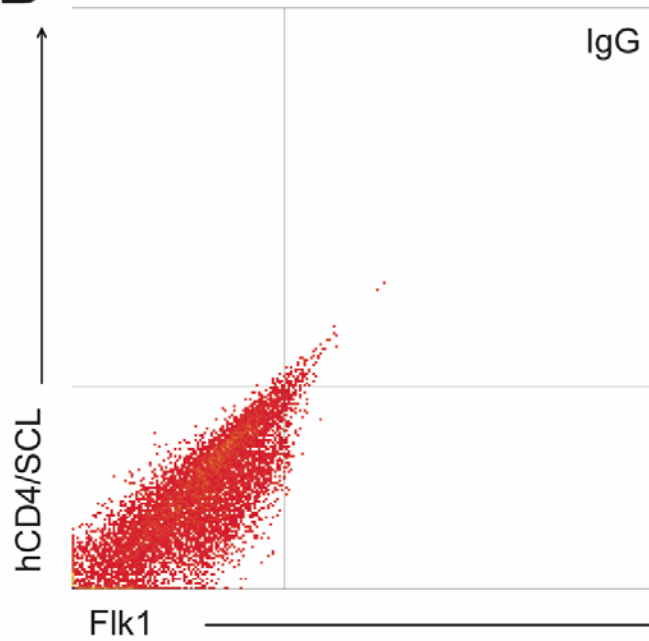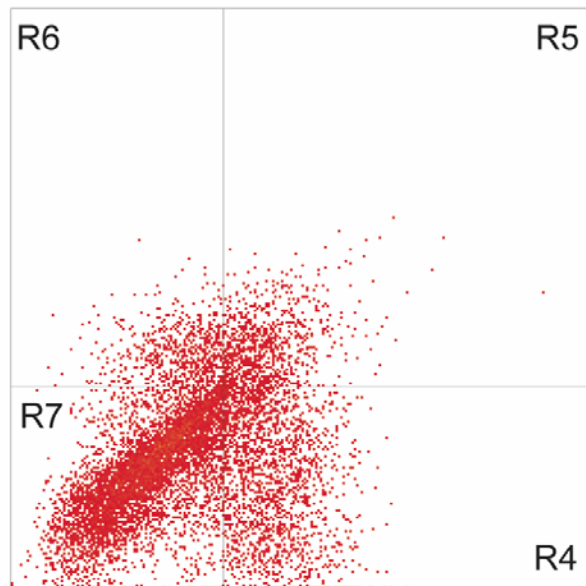

Supplement: blood_blood-2007-04-086827_4.pdf [file blood_blood-2007-04-086827_4.pdf]

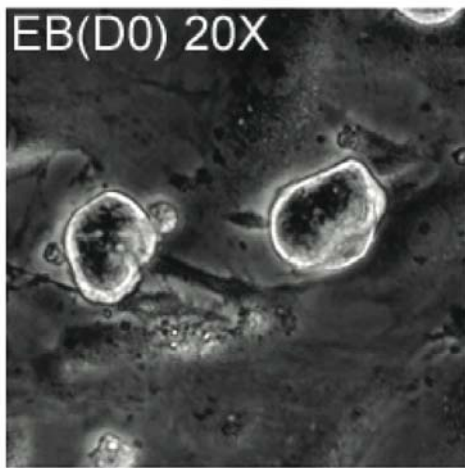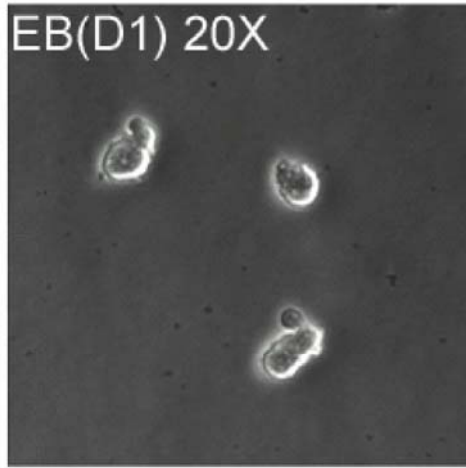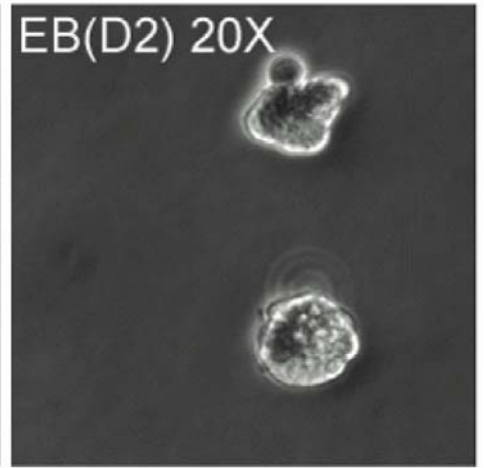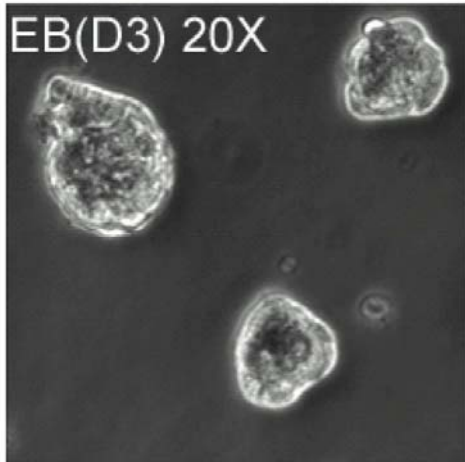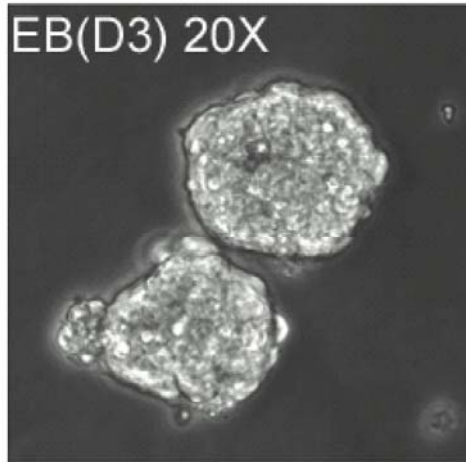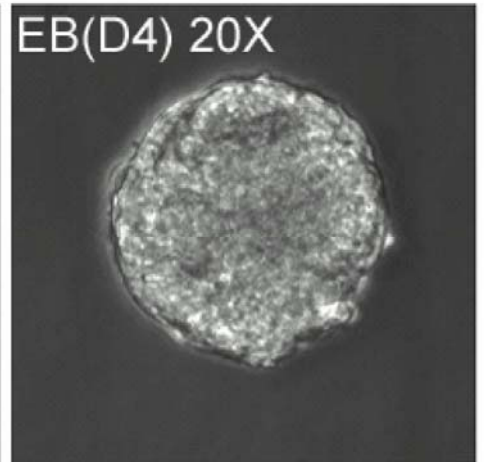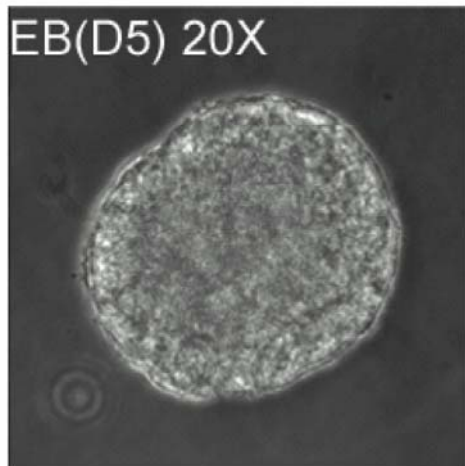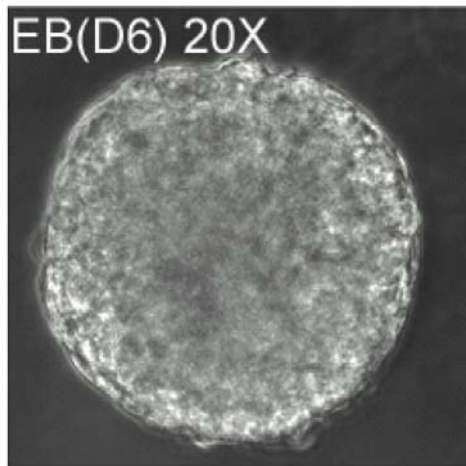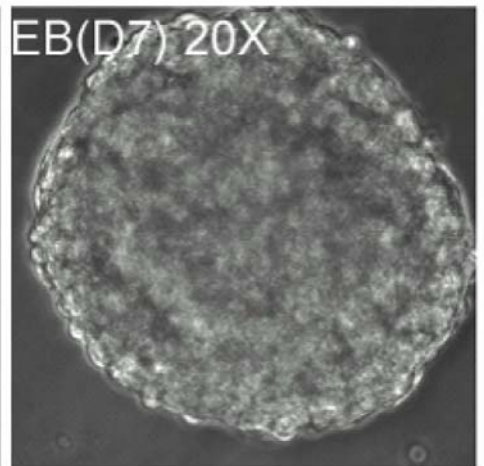

Supplement: blood_blood-2007-04-086827_5.pdf [file blood_blood-2007-04-086827_5.pdf]

**A**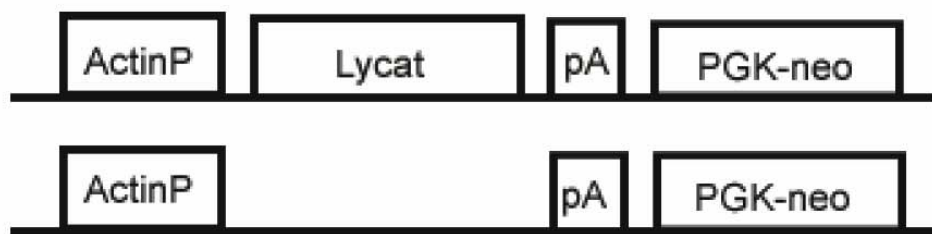**B**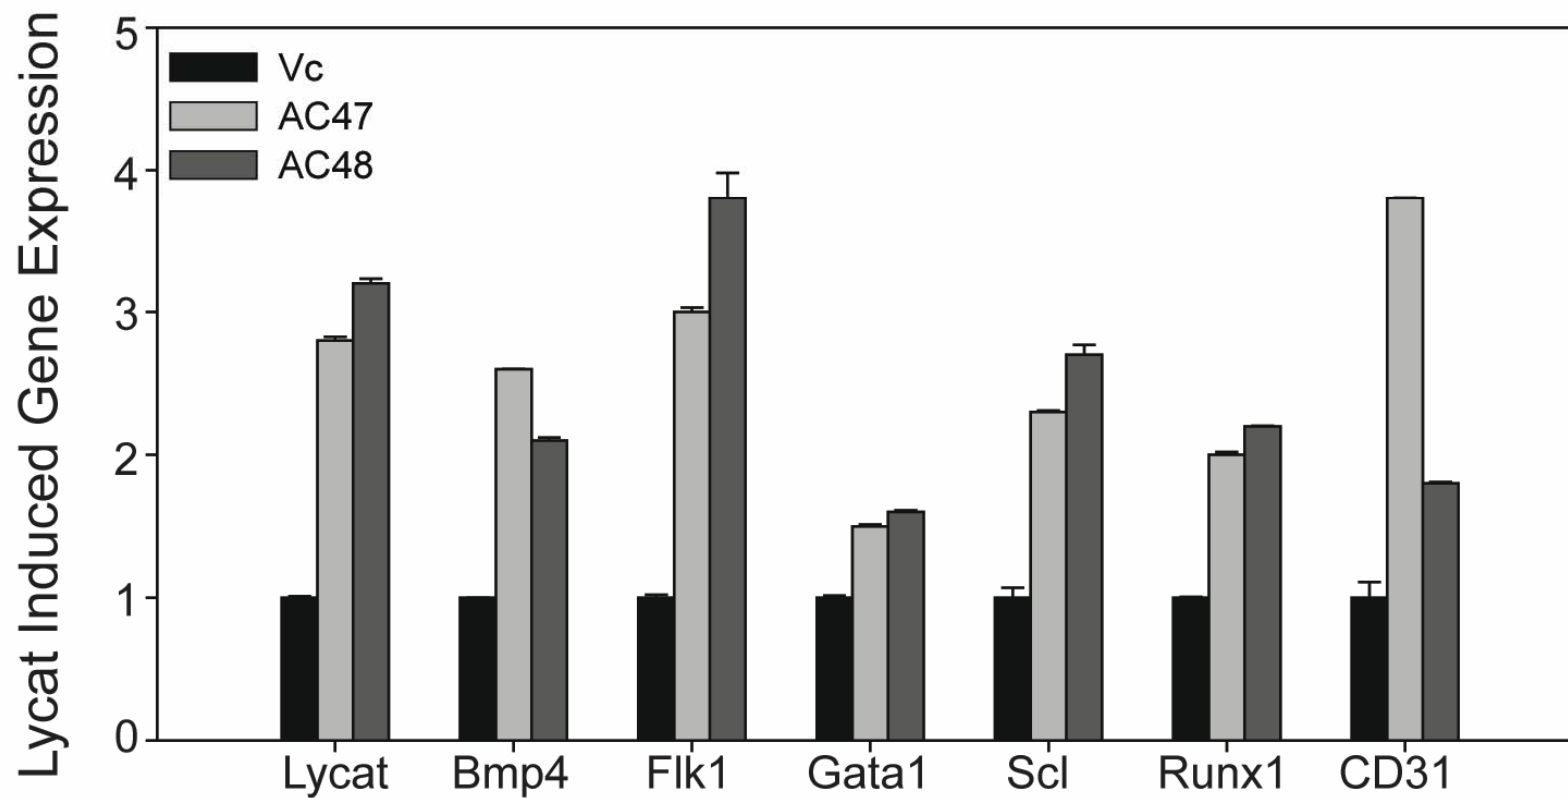

Supplement: blood_blood-2007-04-086827_6.pdf [file blood_blood-2007-04-086827_6.pdf]

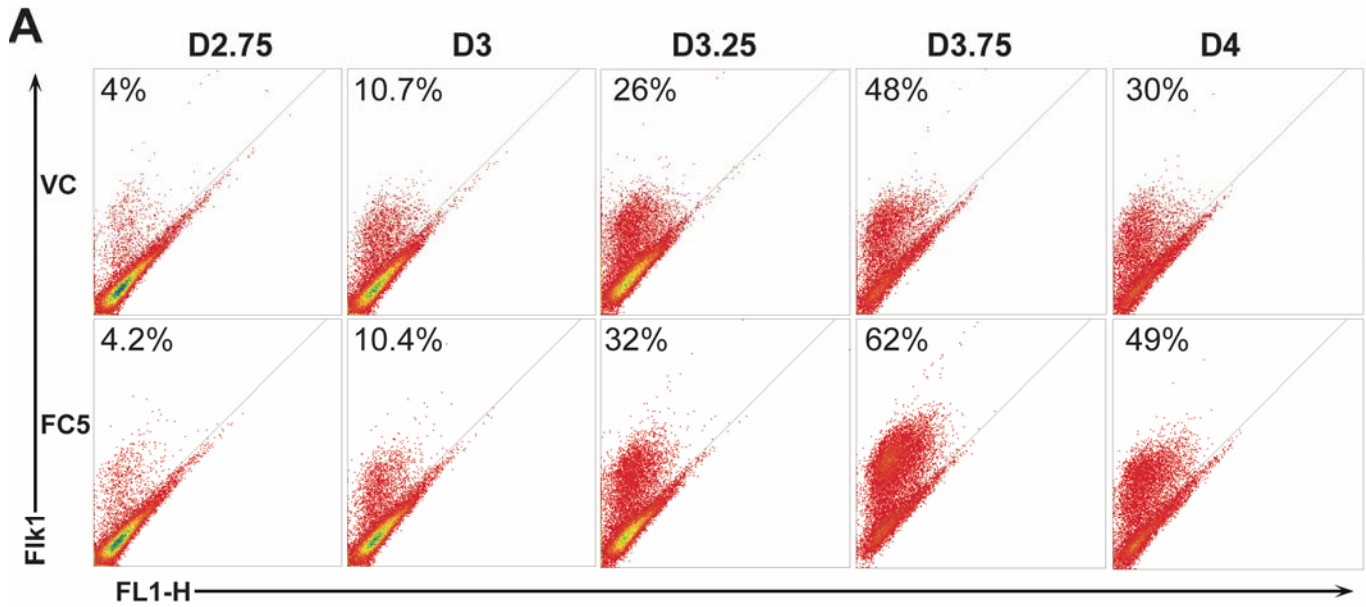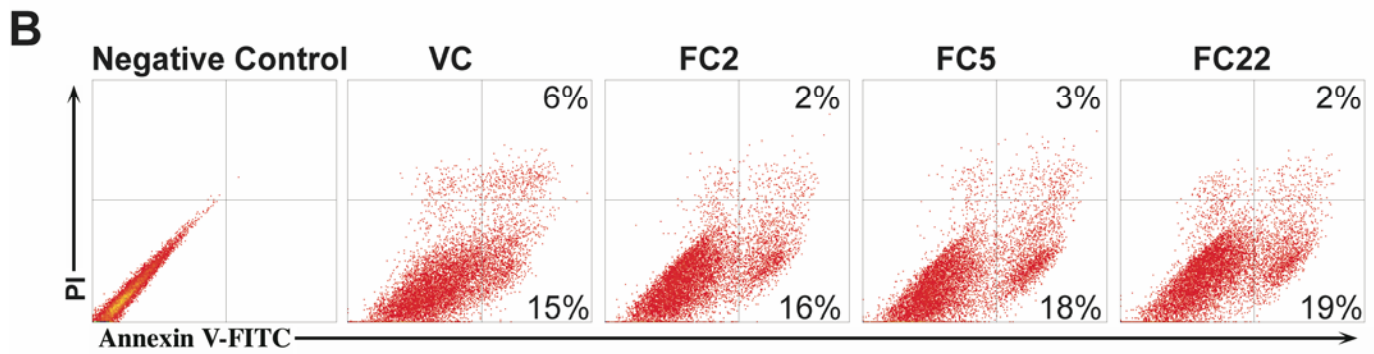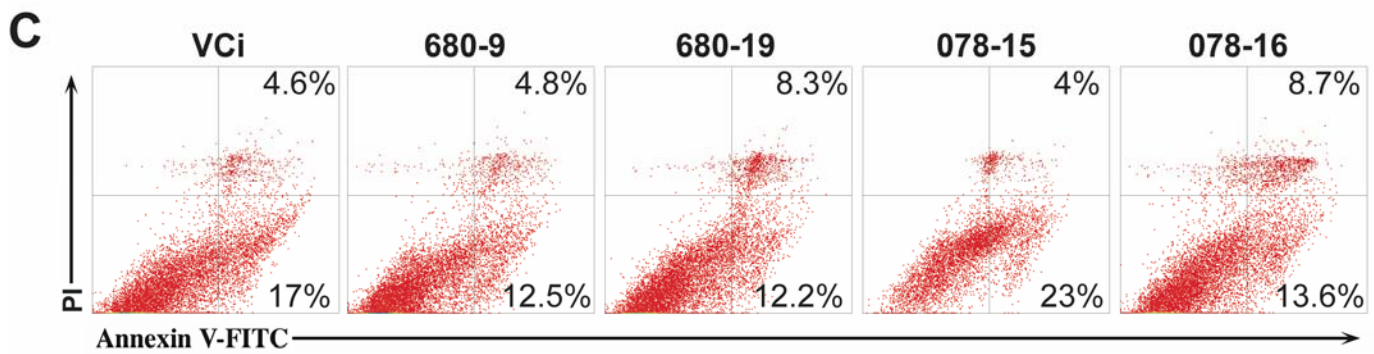

Supplement: blood_blood-2007-04-086827_7.pdf [file blood_blood-2007-04-086827_7.pdf]
